# Supplementary material for: SCUBE1 promotes pulmonary artery smooth muscle cell proliferation and migration in acute pulmonary embolism by modulating BMP7
Source: PeerJ. 2024 Jan 19;12:e16719. doi: 10.7717/peerj.16719 (PMC10802153; doi:10.7717/peerj.16719)
Supplement: Data S1 [file peerj-12-16719-s001.xlsx]

## Sheet: figure1
			SCUBE1 expression		Healthy control		APE			Control	10	20	40
					1.2		2.85			0.84	2.77	3.25	2.76
					0.25		2.47			0.93	2.61	3.5	3.23
					1.12		2.35			1.07	2.69	3.28	3.21
					1.02		2.15			1.13	3.05	3.41	3.21
					1.1		2.36			0.93	2.35	3.43	3.66
					0.91		3.15
					1.99		3.24
					0.87		3.14
					0.29		2.91
					0.65		4.11
					0.28		2.98
					0.84		3.15
					1.25		2.13
					2.14		3.27
					3.15		3.33
					1.18		3.65
					1.84		3.54
					1.25		3.26
					1.94		3.69
					0.89		3.98
					0.93		3.85
					0.37		3.67
					0.54		1.54
					0.66		2.18
					1.35		1.96
					1.58		1.87
					1.08		1.98
					0.87		2.08
					0.57		2.15
					1.54		2.26
					1.03		2.65
					1.29		2.5
					1.76		1.6
					1.54		2.99
					2.35		1.89
					1.41		2.41
					0.31		2.54
					1.95		2.36
					1.54		2.54
					1.7		2.12
					0.52		3.14
					0.85		3.21
					0.74		3.05
					0.93		1.08
					1.14		2.74
					1.25		1.88
					1.67		2.85
					1.24		2.36
					0.6		1.77
					0.19		2.96

## Sheet: figure 2-3
			Control	PDGF		PDGF+sh-NC			PDGF+sh-SCUBE1
	SCUBE1 expression		0.8	3.5		3.35			1.32
			0.76	3.69		3.63			1.16
			1.18	2.92		3.35			1.09
			0.89	3.58		3.09			1.03
			0.86	3.24		3.35			0.68
		0 h	0.17	0.25		0.15			0.19
			0.28	0.15		0.26			0.2
			0.16	0.18		13			0.15
			0.21	0.25		0.3			0.17
			0.12	0.2		0.15			0.31
		24 h	0.16	0.39		0.38			0.35
			0.36	0.26		0.35			0.35
			0.16	0.54		0.48			0.22
			0.23	0.32		0.53			0.23
			0.27	0.42		0.42			0.38
		48 h	0.47	0.68		0.92			0.41
			0.26	0.93		0.79			0.45
			0.2	0.81		0.84			0.59
			0.33	0.81		0.94			0.66
			0.21	0.82		0.89			0.46
		72 h	0.52	1.31		1.31			9
			0.47	1.06		1.47			0.93
			0.57	1.33		1.24			0.79
			0.39	1.07		1.48			0.78
			0.42	1.35		1.43			0.77
		96 h	0.78	2.01		1.86			1.34
			0.54	1.69		1.95			1.29
			0.72	1.8		2.25			1.04
			0.69	1.82		1.76			1.02
			0.7	2.1		1.95			1.24
			29.56	37.7		34.26			29.4
	EDU positive cells		27.75	33.96		38.79			25.93
			29.03	34.8		38.67			32.08
			23.84	38.43		39.5			30.44
			23.57	37.5		35.04			29.4
	PCNA expression		0.81	2.79		2.39			0.95
			0.89	2.34		2.44			1.27
			0.98	2.8		2.13			0.89
			0.93	2.43		2.79			1.23
			1.13	2.76		2.22			1.09
			101	295		262			158
			122	244		288			196
Number of migrated cells			53	318		320			125
			63	245		209			118
			96	241		284			115
			0.94	2.5		2.16			1.32
			0.94	2.15		2.23			1.32
	%Wound closure		1.2	2.27		2.41			1.19
			1	2.59		2.45			1.23
			1.11	2.36		2.22			1.21

## Sheet: figure 4-5
						Control	10	20	40
				BMP7 expression		0.9	2.98	4.04	3.89
						1.15	2.87	4.35	3.71
						1.15	2.89	3.69	3.81
						0.95	2.52	3.91	3.71
						0.94	2.67	3.54	4.35
						vector		SCUBE1		sh-NC		sh-SCUBE1
				BMP7 expression		1.14		3.77		0.99		0.45
						1.09		3.38		1.05		0.26
						0.92		3.97		1.09		0.27
						1.02		3.43		0.99		0.38
						0.97		3.58		0.85		0.42
						PDGF		PDGF+sh-NC+vector			PDGF+sh-SCUBE1			PDGF+sh-SCUBE1+BMP7
				BMP7 expression		0.9		0.93			0.46			0.91
						1.05		0.88			0.55			0.84
						0.94		1.14			0.41			1.05
						0.6		1.05			0.34			0.86
						1.13		1.12			0.31			0.91
					0 h	0.14		0.19			0.13			0.12
						0.24		0.28			0.19			0.27
						0.23		0.14			0.24			0.22
						0.27		0.24			0.31			0.27
						0.24		0.28			0.21			0.2
					24 h	0.35		0.49			0.31			0.33
						0.54		0.52			0.4			0.38
						0.33		0.41			0.19			0.57
						0.34		0.44			0.3			0.38
						0.76		0.52			0.38			0.41
					48 h	1.02		0.73			0.52			0.66
						0.8		0.92			0.71			0.58
						0.89		1.1			0.5			0.67
						0.79		0.91			0.7			0.7
						0.93		0.87			0.49			0.71
					72 h	1.42		1.66			0.85			1.31
						1.16		1.28			0.76			1.3
						1.56		1.38			0.78			0.96
						1.6		1.63			0.93			1.26
						1.34		1.47			0.75			1.04
					96 h	1.93		1.71			0.96			1.42
						2.05		2.08			1.33			1.56
						2.1		2.07			1.15			1.55
						1.91		2			1.24			1.66
						2.24		1.81			1.04			1.28
						37.29		44.3			27.61			34.88
						41.9		40.27			28.14			37.73
				EDU positive cells		39.05		41.2			26.64			38.76
						43.71		45.97			32.02			33.8
						41.79		44.41			28.33			37.09
				PCNA expression		0.94		1.01			0.25			0.96
						1.14		0.89			0.4			0.87
						1.13		1.03			0.32			0.86
						0.94		0.86			0.25			0.82
						1.13		1.02			0.39			0.82
						264		265			176			277
						302		316			108			191
			Number of migrated cells			271		316			150			209
						334		362			98			242
						322		264			150			223
						1.14		1.3			0.57			0.88
				%Wound closure		1.04		1.12			0.48			0.98
						0.77		0.92			0.45			1.07
						1.12		1.12			0.39			0.93
						0.86		1.12			0.58			0.92
